# Supplementary material for: MDS criteria for the diagnosis of progressive supranuclear palsy overemphasize Richardson syndrome
Source: PubMed Central journal article supplement (PMC7480918; doi:10.1002/acn3.51065), 2020-07-31
Supplement: ACN3-7-1702-s001.pdf [file ACN3-7-1702-s001.pdf]

| Subject | Disease Duration (years) | Ocular Motor Function (O1/2/3) | Postural Instability (P1/2/3) | Akinesia (A1/2/3) | Cognitive Function (C1/2/3) | L-Dopa resistance | Dys-arthritis | Dys-phagia | movement disorders specialist diagnosis | Diagnosis and according level of certainty applying MDS-PSP criteria before MAX rules |                 |                        | number of diagnoses before Max rules | NINDS PSP-RS | MRPI  | Mid-brain to pons ratio |
|---------|--------------------------|--------------------------------|-------------------------------|-------------------|-----------------------------|-------------------|---------------|------------|-----------------------------------------|---------------------------------------------------------------------------------------|-----------------|------------------------|--------------------------------------|--------------|-------|-------------------------|
|         |                          |                                |                               |                   |                             |                   |               |            |                                         | probable                                                                              | possible        | suggestive of          |                                      |              |       |                         |
| 1       | 3                        | O2                             | P3                            | A2                | 0                           | no                | yes           | no         | PSP                                     | PSP-P                                                                                 | PSP-RS          | PSP-OM                 | 3                                    | NA           | NA    | NA                      |
| 2       | 3                        | O1                             | P1                            | A2                | C2                          | yes               | no            | yes        | PSP-RS                                  | PSP-RS, PSP-P, PSP-F                                                                  | PSP-OM          | PSP-PI, PSP-P          | 6                                    | yes          | NA    | NA                      |
| 3       | 2                        | O1                             | P1                            | A2                | C2                          | yes               | no            | no         | PSP                                     | PSP-RS, PSP-P, PSP-F                                                                  | PSP-OM          | PSP-PI, PSP-P          | 6                                    | yes          | NA    | NA                      |
| 4       | 2                        | O1                             | P1                            | A2                | C2                          | NA                | no            | no         | PSP                                     | PSP-RS, PSP-P, PSP-F                                                                  | PSP-OM          | PSP-PI, PSP-P          | 6                                    | yes          | NA    | NA                      |
| 5       | 2                        | O1                             | P1                            | 0                 | 0                           | NA                | yes           | no         | PSP                                     | PSP-RS                                                                                | PSP-OM          | PSP-PI                 | 3                                    | yes          | NA    | NA                      |
| 6       | 4                        |                                | NA                            |                   |                             | NA                | no            | no         | PSP                                     |                                                                                       |                 |                        |                                      | NA           | NA    | NA                      |
| 7       | 4                        |                                | NA                            |                   |                             | yes               | no            | no         | PSP                                     |                                                                                       |                 |                        |                                      | NA           | NA    | NA                      |
| 8       | 2                        | O1                             | P2                            | A2                | C2                          | NA                | yes           | yes        | PSP                                     | PSP-RS, PSP-P, PSP-F                                                                  | PSP-OM          | PSP-PI, PSP-P          | 6                                    | NA           | NA    | NA                      |
| 9       | 2                        | O1                             | 0                             | A2                | 0                           | yes               | yes           | no         | PSP                                     | PSP-P                                                                                 | PSP-OM          |                        | 2                                    | NA           | NA    | NA                      |
| 10      | 4                        |                                | NA                            |                   |                             | yes               | no            | no         | PSP                                     |                                                                                       |                 |                        |                                      | NA           | NA    | NA                      |
| 11      | 1                        | O1                             | P1                            | A2                | 0                           | yes               | no            | no         | PSP                                     | PSP-RS, PSP-P                                                                         | PSP-OM          | PSP-PI, PSP-P          | 5                                    | yes          | NA    | NA                      |
| 12      | 3                        | O2                             | P1                            | A3                | 0                           | yes               | yes           | no         | PSP                                     | PSP-RS, PSP-P                                                                         |                 | PSP-OM, PSP-PI, PSP-P  | 5                                    | NA           | NA    | NA                      |
| 13      | 3                        | 0                              | P1                            | A1                | 0                           | yes               | no            | no         | PSP-PAGF                                |                                                                                       | PSP-PAGF        | PSP-PI                 | 2                                    | NA           | NA    | NA                      |
| 14      | 1                        | O1                             | P1                            | A2                | C2                          | yes               | no            | no         | PSP                                     | PSP-RS, PSP-P, PSP-F                                                                  | PSP-OM          | PSP-PI, PSP-P          | 6                                    | yes          | NA    | NA                      |
| 15      | 2                        | O1                             | P1                            | A2                | 0                           | NA                | yes           | no         | PSP                                     | PSP-RS, PSP-P                                                                         | PSP-OM          | PSP-PI, PSP-P          | 5                                    | NA           | NA    | NA                      |
| 16      | 6                        | O2                             | P1                            | A2                | C2                          | yes               | yes           | yes        | PSP                                     | PSP-RS, PSP-P, PSP-F                                                                  |                 | PSP-OM, PSP-PI, PSP-P  | 6                                    | NA           | NA    | NA                      |
| 17      | 6                        |                                | NA                            |                   |                             | yes               | yes           | no         | PSP-RS                                  |                                                                                       |                 |                        |                                      | NA           | NA    | NA                      |
| 18      | 2                        |                                | NA                            |                   |                             | NA                | yes           | no         | PSP                                     |                                                                                       |                 |                        |                                      | NA           | NA    | NA                      |
| 19      | 1                        | O1                             | P1                            | A2                | C1                          | no                | no            | no         | PSP-PNFA                                | PSP-RS, PSP-P                                                                         | PSP-OM, PSP-SL  | PSP-PI, PSP-P, PSP-SL  | 7                                    | yes          | 12,08 | 0,45                    |
| 20      | 1                        | O2                             | P1                            | A2                | 0                           | yes               | yes           | no         | PSP-P                                   | PSP-RS, PSP-P                                                                         |                 | PSP-OM, PSP-PI, PSP-P  | 5                                    | NA           | 10,85 | 0,49                    |
| 21      | 1                        | O1                             | P1                            | 0                 | C2                          | yes               | no            | no         | PSP-RS                                  | PSP-RS, PSP-F                                                                         | PSP-OM          | PSP-OM, PSP-PI         | 5                                    | yes          | 13,83 | 0,51                    |
| 22      | 3                        | O1                             | P2                            | A2                | C2                          | yes               | yes           | yes        | PSP-P                                   | PSP-RS, PSP-P, PSP-F                                                                  | PSP-OM          | PSP-PI; PSP-P          | 6                                    | NA           | 13,69 | 0,49                    |
| 23      | 10                       | O1                             | 0                             | A2                | 0                           | yes               | yes           | yes        | PSP-P                                   | PSP-P                                                                                 | PSP-OM          |                        | 2                                    | NA           | 5,88  | 0,61                    |
| 24      | 3                        | O1                             | P1                            | A2                | C3                          | yes               | yes           | yes        | PSP-CBS                                 | PSP-RS, PSP-P                                                                         | PSP-OM, PSP-CBS | PSP-PI, PSP-P, PSP-CBS | 7                                    | NA           | 12,56 | 0,44                    |
| 25      | 2                        | O2                             | P1                            | 0                 | C2                          | yes               | yes           | no         | PSP-FTD                                 | PSP-RS, PSP-F                                                                         |                 | PSP-OM, PSP-PI         | 4                                    | NA           | 13,73 | 0,46                    |
| 26      | 2                        | O1                             | P1                            | A3                | C3                          | yes               | yes           | no         | PSP-CBS                                 | PSP-RS, PSP-P                                                                         | PSP-OM, PSP-CBS | PSP-PI, PSP-P          | 6                                    | yes          | 17,05 | 0,64                    |
| 27      | 4                        | O2                             | 0                             | A3                | 0                           | yes               | yes           | no         | PSP-P                                   | PSP-P                                                                                 |                 | PSP-OM, PSP-P          | 3                                    | NA           | 9,38  | 0,60                    |

|    |    |    |    |    |    |     |     |     |          |                      |                 |                                   |   |     |       |      |
|----|----|----|----|----|----|-----|-----|-----|----------|----------------------|-----------------|-----------------------------------|---|-----|-------|------|
| 28 | 2  | O1 | P1 | 0  | 0  | yes | no  | no  | PSP-RS   | PSP-RS               | PSP-OM,         | PSP-PI                            | 3 | yes | 14,26 | 0,48 |
| 29 | 1  | O1 | P2 | A2 | C2 | yes | yes | no  | PSP      | PSP-RS, PSP-P, PSP-F | PSP-OM          | PSP-PI, PSP-P                     | 6 | NA  | 16,12 | 0,46 |
| 30 | NA |    | NA |    |    | yes | yes | yes | PSP      |                      |                 |                                   |   | NA  | 10,09 | 0,60 |
| 31 | 1  | O1 | P1 | A3 | C2 | yes | yes | yes | PSP      | PSP-RS, PSP-P, PSP-F | PSP-OM          | PSP-PI, PSP-P                     | 6 | yes | 18,58 | 0,47 |
| 32 | 3  | O2 | 0  | A3 | 0  | yes | yes | no  | PSP-P    | PSP-P                |                 | PSP-OM, PSP-P                     | 3 | NA  | 8,67  | 0,66 |
| 33 | 3  |    | NA |    |    | yes | yes | yes | PSP      |                      |                 |                                   |   | NA  | 12,08 | 0,53 |
| 34 | 11 | O1 | P3 | A2 | 0  | yes | yes | no  | PSP-P    | PSP-P                | PSP-OM          | PSP-P                             | 3 | NA  | 10,31 | 0,46 |
| 35 | 4  | O1 | P1 | 0  | C1 | yes | yes | no  | PSP-FTD  | PSP-RS               | PSP-OM, PSP-SL  | PSP-PI, PSP-SL                    | 5 | NA  | 13,96 | 0,44 |
| 36 | NA |    | NA |    |    | yes | yes | yes | PSP      |                      |                 |                                   |   | NA  | 16,20 | 0,45 |
| 37 | 1  | O1 | P1 | A3 | 0  | yes | no  | no  | PSP-P    | PSP-RS, PSP-P        | PSP-OM          | PSP-PI, PSP-P                     | 5 | yes | 18,96 | 0,50 |
| 38 | NA |    | NA |    |    | yes | no  | no  | PSP      |                      |                 |                                   |   | NA  | 8,86  | 0,69 |
| 39 | 4  | O1 | P2 | A2 | C2 | yes | no  | no  | PSP      | PSP-RS, PSP-P, PSP-F | PSP-OM          | PSP-PI, PSP-P                     | 6 | NA  | 14,62 | 0,55 |
| 40 | NA |    | NA |    |    | yes | yes | no  | PSP-RS   |                      |                 |                                   |   | NA  | 19,11 | 0,49 |
| 41 | 1  | O1 | P1 | 0  | 0  | yes | no  | no  | PSP-RS   | PSP-RS               | PSP-OM,         | PSP-PI                            | 3 | yes | 17,39 | 0,42 |
| 42 | 3  | O1 | P2 | A2 | C3 | yes | yes | no  | PSP-CBS  | PSP-RS, PSP-P        | PSP-OM, PSP-CBS | PSP-PI, PSP-P,<br>PSP-CBS         | 7 | NA  | 7,81  | 0,66 |
| 43 | 7  |    | NA |    |    | yes | yes | no  | PSP-P    |                      |                 |                                   |   | yes | 9,21  | 0,55 |
| 44 | 4  | O2 | P1 | 0  | C1 | yes | yes | no  | PSP-P    | PSP-RS               | PSP-SL          | PSP-OM, PSP-PI,<br>PSP-SL         | 5 | yes | 19,27 | 0,36 |
| 45 | 5  |    | NA |    |    | yes | yes | no  | PSP-PAGF |                      |                 |                                   |   | NA  | 17,41 | 0,51 |
| 46 | 5  |    | NA |    |    | yes | yes | no  | PSP      |                      |                 |                                   |   | NA  | 10,39 | 0,62 |
| 47 | 6  | O1 | P1 | A2 | 0  | yes | yes | yes | PSP-RS   | PSP-RS, PSP-P        | PSP-OM          | PSP-PI, PSP-P                     | 5 | NA  | 17,94 | 0,31 |
| 48 | 2  | O1 | P1 | A2 | 0  | yes | no  | no  | PSP      | PSP-RS, PSP-P        | PSP-OM          | PSP-PI, PSP-P                     | 5 | yes | 15,12 | 0,54 |
| 49 | 1  | O1 | P1 | A2 | 0  | yes | no  | no  | PSP-Rs   | PSP-RS, PSP-P        | PSP-OM          | PSP-PI, PSP-P                     | 5 | yes | 14,69 | 0,47 |
| 50 | 3  | O1 | P1 | A2 | C2 | yes | yes | no  | PSP-RS   | PSP-RS, PSP-P, PSP-F | PSP-OM          | PSP-PI, PSP-P                     | 6 | yes | 11,12 | 0,42 |
| 51 | 4  | O2 | P1 | A2 | C3 | yes | no  | no  | PSP-CBS  | PSP-RS, PSP-P        | PSP-CBS         | PSP-OM, PSP-PI,<br>PSP-P, PSP-CBS | 7 | yes | 14,67 | 0,41 |
| 52 | 1  | O1 | P1 | A2 | 0  | yes | yes | no  | PSP      | PSP-RS, PSP-P        | PSP-OM          | PSP-PI, PSP-P                     | 5 | yes | 15,43 | 0,51 |
| 53 | 3  | O2 | P1 | A3 | 0  | no  | yes | no  | PSP-P    | PSP-RS, PSP-P        |                 | PSP-OM, PSP-PI,<br>PSP-P          | 5 | NA  | 8,94  | 0,71 |
| 54 | 4  | O1 | P1 | A2 | C2 | yes | yes | no  | PSP-P    | PSP-RS, PSP-P, PSP-F | PSP-OM          | PSP-PI, PSP-P                     | 6 | yes | 18,86 | 0,41 |
| 55 | 3  | O1 | P1 | A2 | 0  | yes | yes | no  | PSP-P    | PSP-RS, PSP-P        | PSP-OM          | PSP-PI, PSP-P                     | 5 | yes | 12,49 | 0,53 |
| 56 | 2  |    | NA |    |    | yes | yes | no  | PSP-P    |                      |                 |                                   |   | NA  | 12,06 | 0,57 |
| 57 | 2  | O1 | P1 | A2 | 0  | yes | yes | no  | PSP      | PSP-RS, PSP-P        | PSP-OM          | PSP-PI, PSP-P                     | 5 | yes | 20,94 | 0,35 |
| 58 | 2  | O2 | P1 | A2 | 0  | yes | no  | no  | PSP-P    | PSP-RS, PSP-P        |                 | PSP-OM, PSP-PI,<br>PSP-P          | 5 | NA  | 13,87 | 0,49 |

|    |    |    |    |    |    |     |     |     |          |                         |                  |                        |   |     |       |      |
|----|----|----|----|----|----|-----|-----|-----|----------|-------------------------|------------------|------------------------|---|-----|-------|------|
| 59 | 6  | O1 | P1 | A1 | 0  | yes | yes | no  | PSP-PAGF | PSP-RS, PSP-PAGF        | PSP-OM, PSP-PAGF | PSP-PI                 | 5 | yes | 8,99  | 0,53 |
| 60 | 4  |    | NA |    |    | NA  | yes | yes | PSP-PNFA |                         |                  |                        |   | NA  | 13,44 | 0,56 |
| 61 | 4  | O1 | 0  | 0  | C1 | NA  | yes | no  | PSP-PNFA |                         | PSP-OM, PSP-SL   | PSP-SL                 | 3 | NA  | 18,23 | 0,45 |
| 62 | 1  | O1 | P1 | A2 | C2 | yes | yes | no  | PSP-RS   | PSP-RS, PSP-P, PSP-F    | PSP-OM           | PSP-PI, PSP-P          | 6 | yes | 22,27 | 0,40 |
| 63 | 4  | O1 | P1 | A1 | C2 | yes | yes | no  | PSP-PAGF | PSP-RS, PSP-PAGF, PSP-F | PSP-OM, PSP-PAGF | PSP-PI                 | 6 | yes | 9,82  | 0,52 |
| 64 | 5  |    | NA |    |    | NA  | yes | no  | PSP      |                         |                  |                        |   | NA  | 15,27 | 0,48 |
| 65 | 4  |    | NA |    |    | yes | no  | no  | PSP-RS   |                         |                  |                        |   | NA  | 10,56 | 0,59 |
| 66 | 5  |    | NA |    |    | yes | yes | no  | PSP-CBS  |                         |                  |                        |   | nen | 31,69 | 0,40 |
| 67 | 3  | O2 | P1 | A2 | C2 | yes | yes | yes | PSP-P    | PSP-RS, PSP-P, PSP-F    |                  | PSP-OM, PSP-PI, PSP-P  | 6 | NA  | 14,79 | 0,55 |
| 68 | 5  |    | NA |    |    | yes | no  | no  | PSP      |                         |                  |                        |   | NA  | 17,66 | 0,50 |
| 69 | 1  | O1 | P1 | A2 | 0  | NA  | yes | no  | PSP      | PSP-RS, PSP-P           | PSP-OM           | PSP-PI, PSP-P          | 5 | yes | 18,47 | 0,40 |
| 70 | 1  | O1 | P1 | A2 | 0  | yes | yes | no  | PSP      | PSP-RS, PSP-P           | PSP-OM           | PSP-PI, PSP-P          | 5 | yes | 27,55 | 0,46 |
| 71 | 5  |    | NA |    |    | NA  | no  | no  | PSP      |                         |                  |                        |   | NA  | 6,75  | 0,75 |
| 72 | 5  | O1 | P1 | A3 | 0  | yes | no  | no  | PSP-P    | PSP-RS, PSP-P           | PSP-OM           | PSP-PI, PSP-P          | 5 | NA  | 22,91 | 0,47 |
| 73 | 1  | 0  | P1 | A1 | 0  | yes | yes | no  | PSP-PAGF |                         | PSP-PAGF         | PSP-PI                 | 2 | NA  | 14,68 | 0,52 |
| 74 | 3  | O2 | P1 | A1 | C3 | NA  | no  | no  | PSP-P    | PSP-RS, PSP-PAGF        | PSP-PAGF         | PSP-OM, PSP-PI         | 4 | NA  | 9,58  | 0,52 |
| 75 | 8  | O1 | P1 | A2 | C3 | NA  | yes | yes | PSP-CBS  | PSP-RS, PSP-P           | PSP-OM, PSP-CBS  | PSP-PI, PSP-P, PSP-CBS | 7 | NA  | 27,97 | 0,36 |
| 76 | 1  | O2 | P1 | 0  | 0  | NA  | no  | no  | PSP      | PSP-RS                  |                  | PSP-OM, PSP-PI         | 3 | yes | 11,45 | 0,47 |
| 77 | 5  |    | NA |    |    | yes | yes | yes | PSP      |                         |                  |                        |   | NA  | 8,59  | 0,61 |
| 78 | 5  | O2 | P3 | A1 | 0  | yes | no  | no  | PSP-PAGF | PSP-PAGF                | PSP-RS, PSP-PAGF | PSP-OM                 | 4 | NA  | 23,18 | 0,40 |
| 79 | 4  |    | NA |    |    | yes | yes | no  | PSP-P    |                         |                  |                        |   | NA  | 14,34 | 0,42 |
| 80 | 10 |    | NA |    |    | yes | yes | no  | PSP-P    |                         |                  |                        |   | NA  | 15,99 | 0,48 |

Table 1: Application of the MDS-PSP criteria in our single center cohort showing symptoms, movement disorders specialist diagnosis and possible diagnoses before application of the multiple allocation extinction rules (MAX) as well as the measured midbrain to pons ratio and MRPI.
